1 Emergence of mosaic plasmids harboring Tn1546-*ermB* element in *Staphylococcus*

2 *aureus* isolates

3

4 Tsai-Wen Wan,<sup>a</sup> Yu-Tzu Lin,<sup>a</sup> Wei-Chun Hung,<sup>b</sup> Jui-Chang Tsai,<sup>c,d</sup> Yu-Jung Liu,<sup>a</sup> Po-

5 Ren Hsueh,<sup>e,f</sup> Lee-Jene Teng<sup>a,e,#</sup>

6

7 <sup>a</sup>Department of Clinical Laboratory Sciences and Medical Biotechnology, National

8 Taiwan University College of Medicine, Taipei, Taiwan

9 <sup>b</sup>Department of Microbiology and Immunology, Kaohsiung Medical University,

10 Kaohsiung, Taiwan

11 <sup>c</sup>Institute of Medical Device and Imaging, National Taiwan University College of

12 Medicine, Taipei, Taiwan

13 <sup>d</sup>Division of Neurosurgery, Department of Surgery, National Taiwan University

14 Hospital, Taipei, Taiwan

15 <sup>e</sup>Department of Laboratory Medicine, National Taiwan University Hospital, Taipei,

16 Taiwan

17 <sup>f</sup>Department of Internal Medicine, National Taiwan University Hospital, Taipei,

18 Taiwan

19

20 Running Head: Tn1546-*ermB* plasmids in *Staphylococcus aureus*

21 Keywords: *Staphylococcus aureus*, Tn1546-*ermB*, plasmid

22 #Address correspondence to Lee-Jene Teng, [ljteng@ntu.edu.tw](mailto:ljteng@ntu.edu.tw).

23 **ABSTRACT** Antimicrobial resistance in *Staphylococcus aureus* is a major problem  
24 and the acquisition of resistance genes may occur by horizontal gene transfer (HGT).  
25 The transposon, an important means of HGT, is recognized as a mobile genetic  
26 element that can integrate in plasmids, replicate and transfer to other strains. We have  
27 previously reported a novel structure of the *Enterococcus faecium*-originated Tn1546-  
28 *ermB* element in *S. aureus*. The emergence of the Tn1546-like element is an emerging  
29 problem that requires continuous monitoring. In the present study, we expand the  
30 examination of Tn1546-*ermB* element to *ermB*-positive methicillin-susceptible *S.*  
31 *aureus* (MSSA) (n = 116) and *ermB*-positive methicillin-resistant *S. aureus* (MRSA)  
32 (n = 253) during a 16-year period, from 2000 to 2015. PCR mapping showed that 10  
33 MSSA and 10 MRSA carried the Tn1546-*ermB* element. The 10 MSSA belonged to  
34 three sequence types (ST), ST7 (n = 6), ST5 (n = 3), and ST59 (n = 1), and the 10  
35 MRSA belonged to two STs, ST188 (n = 8) and ST965 (n = 2). Since only clonal  
36 complex 5 (including ST5, ST85, ST231, and ST371) MRSA, ST8 MRSA and ST5  
37 MSSA have been previously reported to carry Tn1546 plasmids, this is the first report  
38 describing the presence of the Tn1546-*ermB* element in ST7/5/59 MSSA and  
39 ST188/965 MRSA. Plasmid sequencing revealed that the Tn1546-*ermB* element was  
40 harbored by five different mosaic plasmids. In addition to resistance genes, some  
41 plasmids also harbored toxin genes.

## 43 INTRODUCTION

44 Antimicrobial resistance in *Staphylococcus aureus* is a major problem due to its  
45 high capacity to acquire drug resistance genes by horizontal transfer (1). The problem  
46 of multidrug-resistant *S. aureus* is becoming more serious, and the available drugs to  
47 combat it are decreasing (2).

48 Antibiotic resistance is highly prevalent among common pathogenic bacteria in  
49 Taiwan. For example, the rate of oxacillin resistance in 33,305 *S. aureus* isolates from  
50 eight medical centers in Taiwan is approximately 60%, and the rates of resistance to  
51 erythromycin, clindamycin, gentamicin, and tetracycline are also very high (3).

52 Erythromycin, a macrolide class antibiotic, is an old and well-established  
53 antimicrobial agent that was approved in Taiwan in 1968 (4). Due to its long history  
54 of usage in Taiwan, *S. aureus* isolates are highly resistant to erythromycin (3).

55 There are two major mechanisms for resistance to erythromycin. One uses  
56 methylase (encoded by *erm*) which methylates 23S rRNA, thereby altering the drug  
57 binding site, thus conferring resistance not only to macrolides (erythromycin) but also  
58 to lincosamides (clindamycin) and streptogramin B (MLS phenotype) antibiotics. The  
59 common *erm* gene in *S. aureus* is in Tn554-*ermA* (5, 6), Tn551-*ermB* (7, 8), and *ermC*  
60 (5). The second mechanism is through an efflux pump encoded by the *msrA* or *msrB*,  
61 which confers resistance to the macrolides and streptogramin B only (MS phenotype)

62 (9).

63 We previously reported that the most prevalent resistance gene in erythromycin-  
64 resistant blood isolates of methicillin-susceptible *S. aureus* (MSSA) collected from  
65 2000 to 2012 in Taiwan was *ermB* (10). Although the majority (92%) of *ermB*-  
66 positive MSSA isolates carried structures resembling the mobile element structure  
67 (MES) that has been reported in sequence type 59 (ST59) MRSA (8, 11), we found a  
68 unique structure, the Tn1546-*ermB* element (10). The significance of the Tn1546-  
69 *ermB* element is that Tn1546 is also responsible for vancomycin resistance in  
70 *Enterococcus* spp. (12, 13). The Tn1546-*vanA* was mainly located on the RepA\_N  
71 (pRUM/pLG1) and Inc18 plasmid families in vancomycin-resistant *E. faecium*  
72 (VREfm) (14). The plasmids RepA\_N (pRUM/pLG1) were able to yield plasmid  
73 mosaics and acquire Tn1546-*vanA*, which was the main reason that *vanA* spread in  
74 VREfm (14).

75 Tn1546 could acquire different insertion sequences (ISs), including the most  
76 frequently acquired IS1216V, as well as IS1542, IS1251, and IS19 (15-18). A 92-kb  
77 plasmid of *E. faecium*, pHKK701, contains a 39-kb Tn5506, which carries *ermB* and  
78 IS1216V, and contains Tn1546 with *vanA* (8, 19). The novel Tn1546-*ermB* element,  
79 Tn1546-carrying Tn551-*ermB* and IS1216V was recently reported in *S. aureus* by our  
80 group (10).

81 In this study, we examined the prevalence of the Tn1546-*ermB* element in MSSA  
82 and MRSA during a 16-year period, from 2000 to 2015. The presence of a Tn1546-  
83 like element in different plasmids and lineages of *S. aureus* is an indication that *S.*  
84 *aureus* may have the chance to acquire Tn1546-*vanA* by horizontal gene transfer  
85 (HGT).

## 86 RESULTS

87 **Prevalence of the Tn1546-ermB element.** Of 340 erythromycin-resistant MSSA  
88 isolates collected between 2000 and 2015, 112 (33%) carried the *ermB* gene. Of 1429  
89 erythromycin-resistant MRSA isolates collected between 2006 and 2015, 224 (16%)  
90 carried the *ermB* gene. However, only 10 MSSA and 10 MRSA carried the Tn1546-  
91 *ermB* element.

92 **Molecular epidemiology of the Tn1546-ermB element-carrying isolates.** To  
93 determine the clonal relation between 10 MSSA and 10 MRSA isolates carrying the  
94 Tn1546-*ermB* element, we performed *spa* typing, multi-locus sequence typing  
95 (MLST) (Table 1) and pulsed-field gel electrophoresis (PFGE) (Fig. 1). Of the 10  
96 MSSA isolates, six belonged to ST7 (*spa* type t796), three belonged to ST5 (*spa* type  
97 t002 and t242) and one isolate belonged to ST59 (*spa* type t216). Of the 10 MRSA  
98 isolates, eight belonged to ST188 (*spa* type t189 and t5529) and two isolates belonged  
99 to ST965 (*spa* type t575 and t062). The results of PFGE are shown in Fig. 1. Three  
100 ST5 MSSA isolates from 2002, 2010 and 2012 samples belonged to the same  
101 pulsotype (with 80% similarity cut-off). Two ST965 (CC5) MRSA isolates obtained  
102 from 2012 and 2014 samples were very closely related to ST5 MSSA. Six ST7 MSSA  
103 isolates obtained from 2004 to 2016 samples belonged to the same pulsotype, and the  
104 four isolates from 2012 to 2015 samples were identical. Eight ST188 MRSA isolates

105 obtained from 2009 to 2014 samples belonged to the same pulsotype, and six of them  
106 were identical.

107 **Sanger sequencing of the Tn1546-ermB element and homology analysis.**

108 Representative strains of each STs (ST5 MSSA NTUH\_9448, ST7 MSSA  
109 NTUH\_1027, ST59 MSSA NTUH\_3874, ST188 MRSA NTUH\_6457 and ST965  
110 MRSA NTUH\_5066148) were chosen for sequencing to determine the sequence of  
111 Tn1546-ermB element. The size of the Tn1546-ermB element in all of the above  
112 strains is 14,567 bp. The sequences of Tn1546-ermB element in ST7 MSSA  
113 NTUH\_1027 and ST965 MRSA NTUH\_5066148 were 100% identical. ST5 MSSA  
114 NTUH\_9448 had a nucleotide difference G1354A in *tnp* gene of Tn551 causing  
115 G452R. ST188 MRSA NTUH\_6457 had a nucleotide difference downstream of *ermB*  
116 gene. ST59 MSSA NTUH\_3874 had four nucleotides difference: (1) point mutation  
117 (A299G) of *ermB* gene resulting in N100S, (2) non-coding region point mutation  
118 downstream of *ermB* gene, (3) point mutation (G765A) of *tnp* gene of Tn551, (4)  
119 premature nonsense mutation in *tnp* gene of Tn551, shortening the amino acid length  
120 from 972 to 857.

121 **Location of Tn1546-ermB element.** To determine the location of the Tn1546-  
122 *ermB* element, the agarose plugs of 10 MSSA and 10 MRSA isolates were digested  
123 with S1 nuclease (Fig. 2) and then hybridized with a Dig-labeled *ermB*-specific probe



124 prepared by PCR amplification of *ermB* using primers *ermB*-f and *ermB*-r (Table 2).

125 Isolates of the same ST (ST5, ST7, ST188 and ST965) harbored similar size of

126 plasmids containing *ermB* (Fig. 2).

127 **Sequence analysis of five plasmids harboring the Tn1546-*ermB* element.** The

128 sequences of plasmids in ST5 MSSA NTUH\_9448, ST7 MSSA NTUH\_1027, ST59

129 MSSA NTUH\_3874, ST188 MRSA NTUH\_6457 and ST965 MRSA NTUH\_5066148

130 were determined. Fig. 3 presents the genetic structures of the five plasmids. The 14.5-

131 kb Tn1546-*ermB* element was inserted in four different backbones. Among them, the

132 plasmids pNTUH\_1027 and pNTUH\_6457 (Fig. 3A and 3B) showed mosaic

133 structures that included Tn1546-*ermB* and a 20.7-kb backbone which is similar to

134 pSaa6159 (NCBI accession no. CP002115) of ST93 MRSA. The *repA* gene and the

135 backbone of the above two plasmids were 100% and 99.9% identical, respectively, to

136 those in pSaa6159. The Tn1546-*ermB* element was inserted at the eleven o'clock

137 position in pNTUH\_1027. The Tn1546-*ermB* element was inserted at three o'clock

138 position in pNTUH\_6457 with the disruption of a *tnp* gene of Tn552. Plasmid

139 pNTUH\_5066148 (Fig. 3C) was also a mosaic plasmid and contained the Tn1546-

140 *ermB* and a 24.7-kb backbone which is similar to pCA-347 (NCBI accession no.

141 CP006045) of ST45 MRSA is essentially identical to pN315 (NCBI accession no.

142 AP003139) of ST5 MRSA. The *repA* gene and the backbone of the pNTUH\_5066148

143 was 100% and 99.8% identical, respectively, to those in pCA-347. The *Tn1546-ermB*  
144 element was inserted at the eleven o'clock position in pNTUH\_5066148 with the  
145 disruption of one of the three *rep* gene, shortening the amino acid length from 286 to  
146 271. Plasmid pNTUH\_9448 (Fig. 3D) was another mosaic plasmid, in which the 14.5-  
147 kb *Tn1546-ermB* element was inserted at the five o'clock position and disrupted an  
148 alcohol dehydrogenase gene. The *repA* gene and the backbone of the pNTUH\_9448  
149 was 100% and 94.5% identical, respectively, to those in pWBG744.

150 Plasmid pNTUH\_3874 (Fig. 3E) showed unique features. Nucleotide-nucleotide  
151 BLAST analysis found no significant matches except for the region containing the  
152 *Tn1546-ermB* element. Annotation revealed that *Tn1546-ermB* element has 11 ORFs,  
153 and the backbone of plasmid pNTUH\_3874 has 35 annotated ORFs, including three  
154 conjugal transfer genes (*traB*, *traE* and truncated *traK*), one resolvase gene, one DNA  
155 topoisomerase I gene and two DNA topoisomerase III genes.

156 ***Tn1546-ermB* plasmids in other isolates.** PCR mapping was used to determine  
157 whether the other *Tn1546-ermB*-carrying plasmids contain similar structures in each  
158 ST (Fig. S1, Table S1). Our results indicated that the plasmids in two remaining ST5  
159 MSSA, six ST7 MSSA, seven ST188 MRSA, and one ST965 MRSA display similar  
160 plasmid structures corresponding to each ST.

161 **Conjugal transfer frequency of plasmids harboring the *Tn1546-ermB* element.**

162 To determine whether Tn1546-*ermB* element-carrying plasmids could be transferred  
163 *in vitro* from the clinical ST5/7/59/188/965 *S. aureus* to the laboratory strain ST8  
164 RN2677, we performed conjugation tests. The Tn1546-*ermB* element-carrying  
165 plasmids could be transferred from ST5 NTUH\_9448, ST7 NTUH\_1027, ST59  
166 NTUH\_3874, and ST965 NTUH\_5066148 to RN2677 with a frequency of  $3.1 \times 10^{-10}$ ,  
167  $10^{-7}$ ,  $4.4 \times 10^{-10}$ , and  $1.5 \times 10^{-10}$  per recipient cell, respectively. Transconjugants were  
168 characterized by PCR to test for the presence of *ermB* and *tnp* of Tn1546, and by *spa*  
169 typing, and by erythromycin/gentamicin susceptibility testing. The results showed that  
170 the four different Tn1546-*ermB* plasmids could be transferred *in vitro*, and the  
171 resulting four transconjugants were resistant to erythromycin and gentamicin (Table  
172 3).

173 **DISCUSSION**

174 This study continued the work of our previous study in which the novel structure of  
175 an *E. faecium*-originated Tn1546-*ermB* element in MSSA was reported (10). In the  
176 present study, we examined the presence of Tn1546-*ermB* plasmids in more isolates  
177 of MSSA and MRSA. The overall prevalence of Tn1546-*ermB* plasmid in  
178 erythromycin-resistant *S. aureus* was low, and was slightly higher in MSSA than  
179 MRSA. This result is expected since most of our MRSA isolates were resistant to  
180 erythromycin and belonged to ST5/SCC*mecII* or ST239/SCC*mecIII* harboring *ermA*  
181 located on Tn554 (20).

182 The most frequent ST of 20 Tn1546-*ermB* positive isolates is ST188 SCC*mecIVa*  
183 MRSA (n = 8), followed by ST7 MSSA (n = 6). The ST188 was the common ST of  
184 MSSA in Taiwan (21). However, the ST188 in MRSA is rare in Taiwan; only one  
185 nasal carriage and one bloodstream report have referred to the ST188 MRSA (22, 23).  
186 ST188 MRSA is also rare in other countries. Recently, Hong Kong (24, 25), China  
187 (26) and Korea (27) showed the occurrence of ST188 MRSA. We examined the  
188 ST188 MRSA isolates recovered from blood from 2006 to 2012 in NTUH, and found  
189 that all the tested ST188 MRSA isolates harbored the Tn1546-*ermB* plasmid. The  
190 reason for this finding is unclear. PFGE analysis shows that ST188 MSSA and ST188  
191 MRSA belong to different pulsotypes (data not shown), suggesting some level of

192 genetic diversity.

193 The ST7 MSSA is one of the major sequence types of MSSA bacteremia in Taiwan  
194 (21) and is a prevalent clonotype (13/92, 14.1%) for invasive community-acquired  
195 MSSA infection (28). ST7 MSSA was the dominant MSSA carrying *Tn1546-ermB*  
196 element in this study.

197 Three ST5 MSSA and two ST965 MRSA carried the *Tn1546-ermB* plasmid. ST965  
198 is a single-locus variant (SLV) of ST5. Our data shows that ST5 MSSA and ST965  
199 harbored different plasmids. However, according to PFGE data, the pulsotypes of ST5  
200 MSSA and ST965 MRSA were very close. Twelve cases of vancomycin-resistant *S.*  
201 *aureus* (VRSA) infection have been reported in the United States—all CC5 strains,  
202 each have *Tn1546-vanA*. The CC5 isolates appear to be very well adapted for  
203 acquiring *Tn1546* (29). In the present study ST5-CC5 MSSA and ST965-CC5 MRSA  
204 acquired *Tn1546*.

205 The S1 nuclease PFGE analysis showed that each *Tn1546-ermB* positive strain  
206 harbored only one plasmid. Isolates of the same ST carried a similar size and the same  
207 structure of plasmid. The earliest strain of this study was ST5 MSSA NTUH\_My675  
208 isolated from 2002, which indicates that the acquisition of the *Tn1546-ermB* element  
209 in *S. aureus* did not occur recently.

210 Sequencing of plasmids revealed that there were four different plasmid backbones

211 inserted with the *Tn1546-ermB* element to form five mosaic plasmids. The ST7  
212 pNTUH\_1027 and ST188 pNTUH\_6457 shared nearly identical plasmid backbones  
213 and best match to a 20.7-kb pSaa6159 (NCBI accession no. CP002115) derived from  
214 a dominant clone ST93 isolated in 2004 from community-associated MRSA (CA-  
215 MRSA) in Australia (30, 31). Plasmid pSaa6159 was also highly similar to the pMW2  
216 plasmid (NCBI accession no. AP004832) from strain MW2 USA400 ST1 MRSA,  
217 which caused fatal septicemia and septic arthritis in a 16-month-old girl in North  
218 Dakota, USA, in 1998 (32). The pMW2-like plasmids are common with a wide  
219 geographical distribution (33). This is the first report that pMW2-like plasmid  
220 obtained *Tn1546*.

221 The best match of the plasmid backbones from ST965 NTUH\_5066148 was a 24.7-  
222 kb pCA-347 (NCBI accession no. CP006045), derived from a dominant clone  
223 USA600 ST45 MRSA from a bacteremia infection in 2005 in California (34). Plasmid  
224 pCA-347 was also highly similar to the pN315 plasmid (NCBI accession no.  
225 AP003139) from strain N315 ST5 MRSA, was isolated in 1982 from the pharyngeal  
226 smear of a Japanese patient, which is prevalent in Japan and the USA (35).

227 The plasmids from ST7 pNTUH\_1027, ST188 pNTUH\_6457 and ST965  
228 NTUH\_5066148 contained the identical origin-of-transfer gene *oriT* mimic sequence  
229 of the pWBG749-family. Since the *oriT* may facilitate horizontal transmission (36-

230 38), if this kind of plasmid contains the *Tn1546-ermB* element, then it may also  
231 acquire the *Tn1546-vanA* element. This is alarming since it raises the possibility of  
232 the occurrence of the *Tn1546-vanA* element in *S. aureus*.

233 The backbone of the plasmid in ST5 pNTUH\_9448 is the 27-kb pWBG744 of ST5  
234 MSSA. The mobilized plasmid pWBG744 belongs to the pIB485-family that has been  
235 reported in clinical and colonizing isolates of *S. aureus* (39). Plasmid pIB485 is the  
236 prototype *sed/sej/ser*-encoding plasmid of *S. aureus*. (40-42). The presence of the  
237 enterotoxin genes *sed*, *sej* and *ser* in the pIB485-family plasmids have been  
238 previously reported (33, 41).

239 Only one isolate of ST59 in our collection carried the *Tn1546-ermB* plasmid. The  
240 plasmid backbone of ST59 pNTUH\_3874 is a novel plasmid, since there was no  
241 match to its nucleotide sequence in the NCBI database. This plasmid harbored three  
242 conjugal transfer genes *traB*, *traE* and truncated *traK*. Since the ST59 is the major  
243 genotype in both MSSA and MRSA in Taiwan (43), the occurrence of the *Tn1546-*  
244 *ermB* plasmid in ST59 needs more attention.

245 Previously the *Tn1546* element has only been found in pLW1043 (44) and pBRZ01  
246 (45) in *S. aureus*. The *repA* gene of the four plasmids in the present study was  
247 different from that in pLW1043 (44) or pBRZ01 (45). The size of the *repA* gene is  
248 960 bp in pLW1043, 984 bp in pBRZ01, 861 bp in pSaa6159 (backbone of

249 pNTUH\_1027 and pNTUH\_6457945), 984 bp in pCA-347 (backbone of  
250 pNTUH\_5066148), and 945 bp in pWBG744 (backbone of pNTUH\_9948). This is  
251 the first report of the occurrence of the Tn1546 element in new plasmids.

252 Although the overall prevalence of Tn1546-*ermB* or its plasmids in *S. aureus*  
253 isolates was low, the Tn1546-*ermB* element has existed from at least 2002 to the  
254 present; perhaps there are reservoirs in other species. It is known that the Tn1546  
255 element originated in *E. faecium*. However, the sequence of the 14.5-kb Tn1546-*ermB*  
256 element is more similar to that in pMCCL2 of *Micrococcus caseolyticus* (6, 10).  
257 Studies on other species may provide more information. In addition, transposon  
258 Tn1546 is the prototype of *vanA*-carrying transposons; if *S. aureus* was able to  
259 acquire the Tn1546-*ermB* element, it is likely that it could obtain the Tn1546-*vanA*  
260 element. The transfer of vancomycin resistance to *S. aureus* has occurred *in vivo* by  
261 interspecies transfer of Tn1546 from a co-isolate of *E. faecalis* (44). Recently, Rossi  
262 et al. reported that a conjugative plasmid carrying the Tn1546-*vanA* element could be  
263 transferred to other staphylococci (46). Thus, the occurrence of Tn1546 in *S. aureus*  
264 should be monitored.

265



## 266 MATERIALS AND METHODS

267 **Bacterial isolates.** All isolates were recovered from blood. The MSSA were  
268 collected during the period between 2000 and 2015 and the MRSA were between  
269 2006 and 2015 at the Bacteriology Laboratory, National Taiwan University Hospital,  
270 a 2,500-bed teaching hospital in northern Taiwan. Only one isolate per patient was  
271 collected in this study. *S. aureus* was identified by the Vitek2 system and *nuc* gene  
272 detection (47). Resistance to methicillin was confirmed by *mecA* PCR.

273 **Detection of Tn1546-ermB element structure in erythromycin-resistant**  
274 **isolates.** The Tn1546-ermB element was initially detected by the presence of the *tnp*  
275 gene of Tn1546 and *ermB* gene by PCR (10). The Tn1546-ermB element structure  
276 was mapped by PCR using six primer sets which are listed in Table 2, and the  
277 positions of the primers are indicated in Fig. 4. The Tn1546-ermB element structures  
278 were determined by combining the PCR mapping results and the profiles of resistance  
279 determinants.

280 ***spa* typing, multi-locus sequence typing (MLST), and pulsed-field gel**  
281 **electrophoresis (PFGE).** To determine the genetic relatedness of Tn1546-ermB-  
282 carrying isolates, *spa* typing, MLST, and PFGE were performed. The *spa* typing was  
283 performed as described previously (48). MLST was carried out to determine the  
284 sequence types (STs), which were assigned using the *S. aureus* MLST database

285 ([www.mlst.net](http://www.mlst.net)) (49). PFGE was performed as described previously (50). The DNA in  
286 gel plugs were digested with SmaI (New England BioLabs, Ipswich, MA, USA) and  
287 then separated in a CHEF-DR III apparatus (Bio-Rad Laboratories, Hercules, CA,  
288 USA). Plugs were applied to wells in 0.8% (w/v) agarose gels (Bio-Rad). PFGE was  
289 carried out at 200 V and 12°C for 20 h, with a pulse angle of 120° and pulse times  
290 ranging from 5 to 60 s. The pulsotypes were analyzed by BioNumerics software  
291 version 4.0 (Applied Maths, Sint-Martens-Latem, Belgium).

292 **S1 nuclease digestion-PFGE.** Detection of the presence of plasmids by S1  
293 nuclease digestion-PFGE was performed as described previously (50). Plug slices  
294 were incubated at 37°C for 45 min with 1-10 unit of *Aspergillus oryzae* S1 nuclease  
295 (Invitrogen) in 150 µl of 50 mM NaCl, 30 mM sodium acetate (pH 4.6) and 1 mM  
296 zinc acetate. The plugs were applied to wells of 1.2% (w/v) agarose gels (Bio-Rad),  
297 and run in a CHEF-DR III apparatus (Bio-Rad Laboratories) with a pulse angle of  
298 120° and pulse times of 45 s for 14 h and 25 s for 6 h, at 200 V in 0.5X Tris-Borate-  
299 EDTA (TBE) buffer (51). The linear form of the plasmids separated from the  
300 chromosome DNA and the size of plasmids were estimated.

301 **Conjugation test.** To determine the transfer frequency *in vitro*, strain RN2677 was  
302 used as the recipient in the conjugation test, and mating was carried out on LB agar  
303 medium without selection (52). After 24 h, the mixed cultures were taken from the

304 plates, suspended in brain-heart infusion (BHI) broth medium, and then plated onto  
305 MHA agar medium containing erythromycin (0.5 µg/ml) and rifampicin (80 µg/ml), at  
306 37°C and 24 h. Confirmation of transconjugants was carried out by testing for the  
307 presence of the *ermB* gene by PCR. The transconjugants were also checked by *spa*  
308 typing (the *spa* type of RN2677 is t211) (52).

309 **Southern blot hybridization.** DNA was electrophoresed, depurinated, denatured,  
310 neutralized, and transferred to a Hybond-N<sup>+</sup> nylon membrane (Amersham Pharmacia  
311 Biotech, Buckinghamshire, UK) using the Vacuum Blotting System (VacuGene™  
312 XL, Amersham Pharmacia Biotech, Buckinghamshire, UK). Hybridization with the  
313 PCR DIG Probe Synthesis Kit (Roche Diagnostics GmbH, Penzberg, Germany) was  
314 performed using a Hybridization Incubator Model 1000 (Robbins Scientific).  
315 Detection was performed with the Anti-Digoxigenin-AP and DIG Luminescent  
316 Detection Kit (Roche Diagnostics GmbH, Penzberg, Germany) and results were  
317 captured with the LAS-4000 Imaging System (FUJI FILM Life Science, Japan).

318 **Sequencing of plasmids.** We used “Long accurate PCR *in vitro* cloning kit”  
319 (Takara Shuzo Co. Ltd., Japan) to amplify and clone the fragments of plasmids in ST5  
320 NTUH\_9448 MSSA, ST7 NTUH\_1027 MSSA, ST59 NTUH\_3874 MSSA, ST188  
321 NTUH\_6457 MRSA and ST965 NTUH\_5066148 MRSA. The PCR products were  
322 analyzed on the ABI 3730xl DNA Analyzer (Applied Biosystems).

323      **Nucleotide sequence accession numbers.** The nucleotide sequences of five  
324      plasmids: pNTUH\_9448 in ST5 MSSA, pNTUH\_1027 in ST7 MSSA, pNTUH\_3874  
325      in ST59 MSSA, pNTUH\_6457 in ST188 MRSA and pNTUH\_5066148 in ST965  
326      MRSA have been deposited in the DNA Data Bank of Japan (DDBJ) database under  
327      accession numbers LC377536 to LC377540.

328 **FIGURE**

329 A

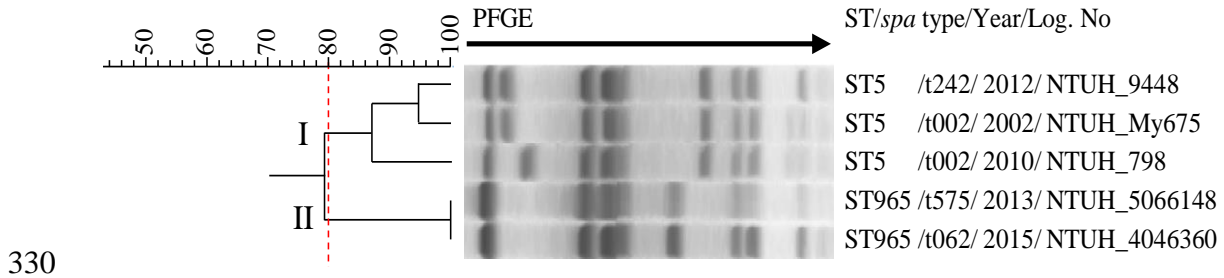

331 B

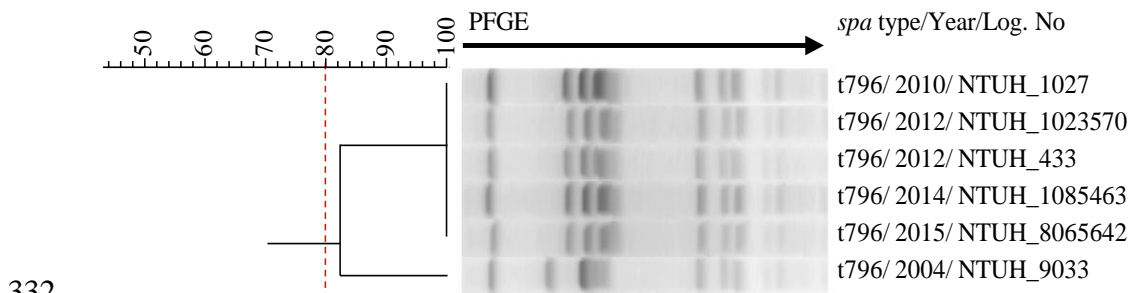

333 C

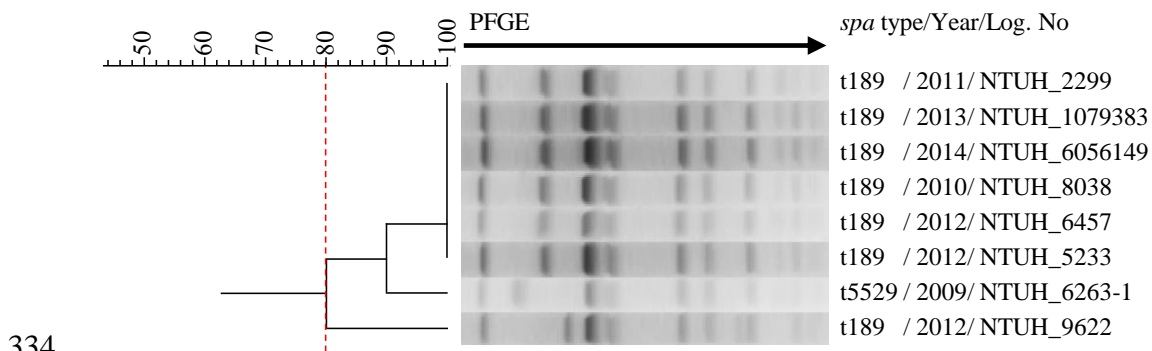

335 **FIG 1** PFGE dendrogram of *Tn1546-ermB* carrying isolates. PFGE cluster was

336 assigned to isolates having 80% or greater similarity from the dendrograms (A) Three

337 ST5 MSSA isolates (pulsotype I) and two ST965 MRSA isolates (pulsotype II) (B)

338 Six ST7 MSSA isolates (C) Eight ST188 MRSA isolates.

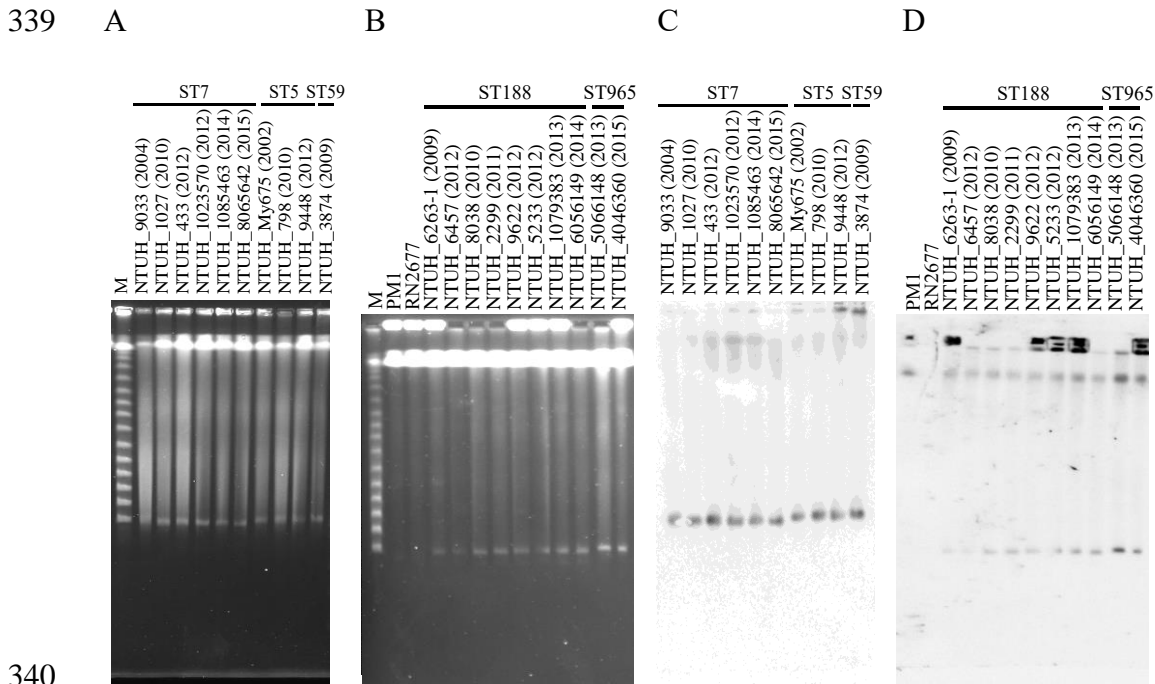

340

341 **FIG 2** S1 nuclease PFGE and Southern blot hybridization with *ermB*. The S1

342 nuclease PFGE from three ST5 MSSA, six ST7 MSSA, one ST59 MSSA, eight

343 ST188 MRSA, and two ST965 MRSA was examined. The PM1 strain harboring a 26-

344 kb plasmid and *ermB* gene located on chromosome was used as a positive control.

345 Strain RN2677, lacking the plasmid and *ermB* gene, was used as a negative control.

346 The size of the M marker starts at 48.5 kb and increases 48.5 kb with each

347 successively larger band. (A, B) The bands indicated the plasmids. The size of

348 plasmids is estimated between 23.1 kb and 48.5 kb. (C, D) DNA was hybridized with

349 the Dig-labelled *ermB*-specific probe and amplified by PCR using primers *ermB*-f and

350 *ermB*-r. Positive signal of *ermB* was detected in respective bands.

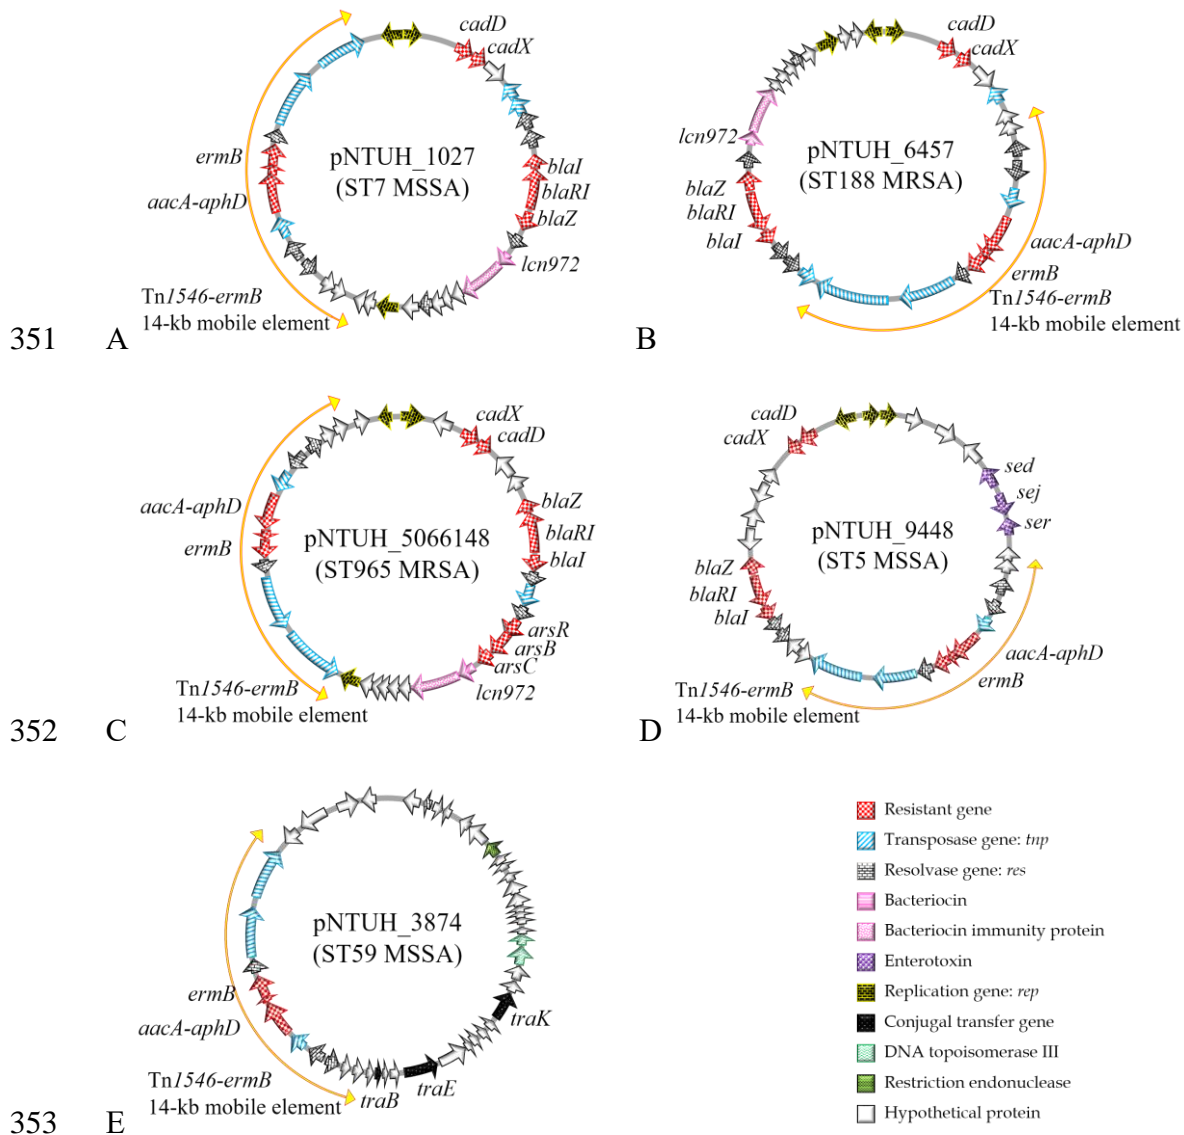

354 **FIG 3** Structure of plasmids. (A) The 35.2-kb ST7 MSSA NTUH\_1027 plasmid  
 355 included 14.5-kb Tn1546-*ermB* element and 20.7-kb backbone which is similar to  
 356 pSaa6159, harboring bacteriocin Lcn972 (*lcn972* gene, pink stripe). The Tn1546-  
 357 *ermB* element was inserted at the eleven o'clock position in pNTUH\_1027. (B) The  
 358 35.2-kb ST188 MRSA NTUH\_6457 plasmid included 14.5-kb Tn1546-*ermB* element  
 359 and 20.7-kb backbone which is similar to pSaa6159, harboring bacteriocin Lcn972  
 360 (*lcn972* gene, pink stripe). The Tn1546-*ermB* element was inserted at the three o'clock  
 361 position in pNTUH\_6457. (C) The 39.2-kb ST965 MRSA NTUH\_5066148 plasmid  
 362 contained the 14.5-kb Tn1546-*ermB* and a 24.7-kb backbone which is similar to pCA-

363 347, harboring bacteriocin Lcn972 (*lcn972* gene, pink stripe). (D) The 42.5-kb ST5  
364 MSSA NTUH\_9448 plasmid included 14.5-kb Tn1546-*ermB* element and 27.2-kb  
365 pWBG744, harboring three enterotoxin genes *sed*, *sej*, and *ser* (purple mesh). (E) The  
366 46.8-kb ST59 MSSA NTUH\_3874 plasmid harbored three conjugal genes *traB*, *traE*,  
367 and *traK*.  
368



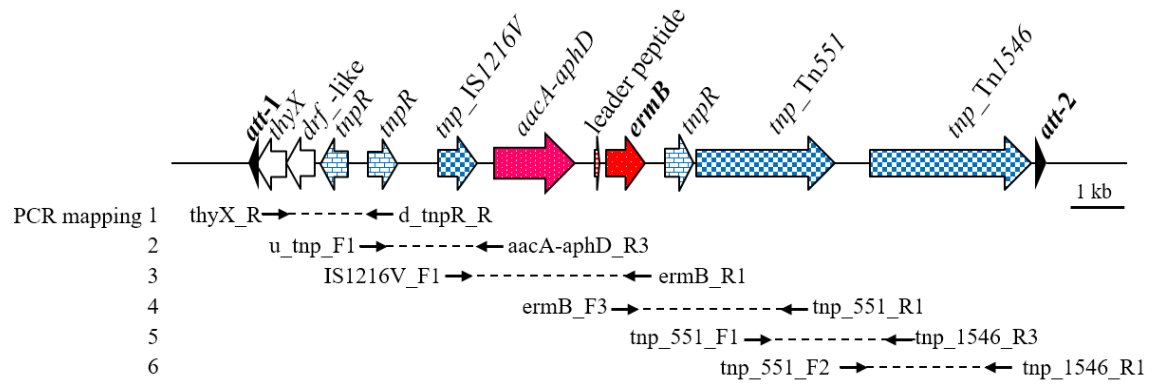

373 **TABLE**

374 **TABLE 1** Distribution of MLST and *spa* types in Tn1546-*ermB* carrying MSSA and MRSA

| Organism | Year      | No. of <i>ermB</i> carried (%) <sup>a</sup> | No. of Tn1546 carried (%) <sup>b</sup> | MLST (No. of isolates) | <i>spa</i> type (No. of isolates) |
|----------|-----------|---------------------------------------------|----------------------------------------|------------------------|-----------------------------------|
| MSSA     | 2000-2015 | 112 (32.9)                                  | 10 (8.9)                               | ST7 (6)                | t796 (6)                          |
|          |           |                                             |                                        | ST5 (3)                | t002 (2), t242 (1)                |
|          |           |                                             |                                        | ST59 (1)               | t216 (1)                          |
| MRSA     | 2006-2015 | 224 (15.7)                                  | 10 (4.5)                               | ST188 (8)              | t189 (7), t5529(1)                |
|          |           |                                             |                                        | ST965 (2)              | t575 (1), t062 (1)                |

375

376 a: Percentage of *ermB* in erythromycin-resistant isolates.

377 b: Rate of Tn1546 in *ermB*-positive isolates.

378 **TABLE 2** Primers used for PCR mapping of *Tn1546-ermB* element

| Primer name  | Sequence (5' to 3')         | Application                                                                             |
|--------------|-----------------------------|-----------------------------------------------------------------------------------------|
| thyX_R       | CCTGTACCCTCTTGATGAGAGG      | PCR mapping for <i>Tn1546-ermB</i> element                                              |
| u_tnp_F1     | CATAACACTGATTCTATCAGCC      | PCR mapping for <i>Tn1546-ermB</i> element                                              |
| d_tnpR_R     | CTACTAGAAAACGGTCAGC         | PCR mapping for <i>Tn1546-ermB</i> element                                              |
| IS1216V_F1   | CCGTGGGCTACTATCTTCGTT       | PCR mapping for <i>Tn1546-ermB</i> element                                              |
| aacA-aphD_R3 | CATCTTCCCAAGGCTCTG          | PCR mapping for <i>Tn1546-ermB</i> element                                              |
| ermB_F3      | GCCAGCGGAATGCTTTCATCCTAAACC | PCR mapping for <i>Tn1546-ermB</i> element                                              |
| ermB_R1      | AGTAACGGTACTTAAATTGTTTAC    | PCR mapping for <i>Tn1546-ermB</i> element                                              |
| tnp_551_F1   | CGGTATCCTGGGTGT             | PCR mapping for <i>Tn1546-ermB</i> element                                              |
| tnp_551_R1   | ATTCTGATGCGAGG              | PCR mapping for <i>Tn1546-ermB</i> element                                              |
| tnp_551_F2   | ACTAGGTCGCATTGAAAAGAG       | PCR mapping for <i>Tn1546-ermB</i> element                                              |
| tnp_1546_R3  | GTGTAGTAGGTTCTAGCAC         | PCR mapping for <i>Tn1546-ermB</i> element                                              |
| tnp_1546_R1  | AGGGATGCTGAACTTTTCC         | PCR mapping for <i>Tn1546-ermB</i> element<br>and detection <i>tnp</i> of <i>Tn1546</i> |
| ermB-f       | GAAAAAGTACTCAACCAAATA       | Detection <i>ermB</i> , and <i>ermB</i> probe for<br>Southern blot hybridization        |
| ermB-r       | AGTAACGGTACTTAAATTGTTTAC    | Detection <i>ermB</i> , and <i>ermB</i> probe for<br>Southern blot hybridization        |
| tnp_1546_F3  | GGCGCATGTATGAAGACTC         | Detection <i>tnp</i> of <i>Tn1546</i>                                                   |

379

380 **TABLE 3** Transfer frequency of plasmids by conjugation

| Donor MSSA   |                        |                   | Transfer frequency <sup>a</sup> | MIC of transconjugant (µg/ml) |            |
|--------------|------------------------|-------------------|---------------------------------|-------------------------------|------------|
| Strain       | Genotype               | Plasmid size (kb) |                                 | Erythromycin                  | Gentamicin |
| NTUH_9448    | ST5/ <i>spa</i> t242   | 42.5              | 3.1 X 10 <sup>-10</sup>         | >256                          | 8          |
| NTUH_1027    | ST7/ <i>spa</i> t796   | 35.2              | 10 <sup>-7</sup>                | >256                          | 8          |
| NTUH_3874    | ST59/ <i>spa</i> t216  | 46.8              | 4.4 X 10 <sup>-10</sup>         | >256                          | 8          |
| NTUH_5066148 | ST965/ <i>spa</i> t575 | 35.2              | 1.5 X 10 <sup>-10</sup>         | >256                          | 64         |

381 <sup>a</sup> Transconjugant per donor cell.

382 **REFERENCES**

- 383 1. **Chambers HF, DeLeo FR.** 2009. Waves of resistance: *Staphylococcus aureus*  
384 in the antibiotic era. *Nat Rev Microbiol* **7**:629-641.
- 385 2. **Franklin D. Lowy, M.D.** 1998. *Staphylococcus aureus* infections. *N Engl J*  
386 *Med* **339**:520-532.
- 387 3. **Chang S-C, Hsieh W-C, Liu C-Y.** 2000. High prevalence of antibiotic  
388 resistance of common pathogenic bacteria in Taiwan. *Diagn Microbiol Infect*  
389 *Dis* **36**:107-112.
- 390 4. **Hsueh P-R, Liu C-Y, Luh K-T.** 2002. Current status of antimicrobial  
391 resistance in Taiwan. *Emerg Infect Dis* **8**:132-137.
- 392 5. **Thakker-Varia S, Jenssen W, Moon-McDermott L, Weinstein M, Dubin D.**  
393 1987. Molecular epidemiology of macrolides-lincosamides-streptogramin B  
394 resistance in *Staphylococcus aureus* and coagulase-negative staphylococci.  
395 *Antimicrob Agents Chemother* **31**:735-743.
- 396 6. **Hiramatsu K, Ito T, Tsubakishita S, Sasaki T, Takeuchi F, Morimoto Y,**  
397 **Katayama Y, Matsuo M, Kuwahara-Arai K, Hishinuma T.** 2013. Genomic  
398 Basis for Methicillin Resistance in *Staphylococcus aureus*. *Infect Chemother*  
399 **45**:117-136.
- 400 7. **Novick R, Murphy E, Gryczan T, Baron E, Edelman I.** 1979. Penicillinase  
401 plasmids of *Staphylococcus aureus*: restriction-deletion maps. *Plasmid* **2**:109-  
402 129.
- 403 8. **Hung W-C, Takano T, Higuchi W, Iwao Y, Khokhlova O, Teng L-J,**  
404 **Yamamoto T.** 2012. Comparative Genomics of Community-Acquired ST59  
405 Methicillin-Resistant *Staphylococcus aureus* in Taiwan: Novel Mobile  
406 Resistance Structures with *IS1216V*. *PLoS One* **7**:e46987.

- 407 9. **Navaneeth BV.** 2006. A preliminary in vitro study on inducible and  
408 constitutive clindamycin resistance in *Staphylococcus aureus* from a South  
409 Indian tertiary care hospital. *Int J Infect Dis* **10**:184-185.
- 410 10. **Wan T-W, Hung W-C, Tsai J-C, Lin Y-T, Lee H, Hsueh P-R, Lee T-F, Teng**  
411 **L-J.** 2016. Novel Structure of *Enterococcus faecium*-Originated *ermB*-Positive  
412 Tn1546-Like Element in *Staphylococcus aureus*. *Antimicrob Agents*  
413 *Chemother* **60**:6108-6114.
- 414 11. **Hung W-C, Wan T-W, Kuo Y-C, Yamamoto T, Tsai J-C, Lin Y-T, Hsueh P-**  
415 **R, Teng L-J.** 2016. Molecular Evolutionary Pathways toward Two Successful  
416 Community-Associated but Multidrug-Resistant ST59 Methicillin-Resistant  
417 *Staphylococcus aureus* Lineages in Taiwan: Dynamic Modes of Mobile  
418 Genetic Element Salvages. *PLoS One* **11**:e0162526.
- 419 12. **Périchon B, Courvalin P.** 2009. VanA-type vancomycin-resistant  
420 *Staphylococcus aureus*. *Antimicrob Agents Chemother* **53**:4580-4587.
- 421 13. **Willems RJ, Top J, van den Braak N, van Belkum A, Mevius DJ,**  
422 **Hendriks G, van Santen-Verheuevel M, van Embden JD.** 1999. Molecular  
423 diversity and evolutionary relationships of Tn1546-like elements in  
424 enterococci from humans and animals. *Antimicrob Agents Chemother* **43**:483-  
425 491.
- 426 14. **Freitas AR, Tedim AP, Francia MV, Jensen LB, Novais C, Peixe L,**  
427 **Sánchez-Valenzuela A, Sundsfjord A, Hegstad K, Werner G.** 2016.  
428 Multilevel population genetic analysis of *vanA* and *vanB* *Enterococcus*  
429 *faecium* causing nosocomial outbreaks in 27 countries (1986–2012). *J*  
430 *Antimicrob Chemother* **71**:3351-3366.
- 431 15. **Foglia G, Del Grosso M, Vignaroli C, Bagnarelli P, Varaldo PE, Pantosti**

- 432           **A, Biavasco F.** 2003. Molecular analysis of Tn1546-like elements mediating  
433           high-level vancomycin resistance in *Enterococcus gallinarum*. J Antimicrob  
434           Chemother **52**:772-775.
- 435   16.   **Clark NC, Weigel LM, Patel JB, Tenover FC.** 2005. Comparison of  
436           Tn1546-like elements in vancomycin-resistant *Staphylococcus aureus* isolates  
437           from Michigan and Pennsylvania. Antimicrob Agents Chemother **49**:470-472.
- 438   17.   **Huh JY, Lee WG, Lee K, Shin WS, Yoo JH.** 2004. Distribution of insertion  
439           sequences associated with Tn1546-like elements among *Enterococcus faecium*  
440           isolates from patients in Korea. J Clin Microbiol **42**:1897-1902.
- 441   18.   **Khan MA, Van Der Wal M, Farrell DJ, Cossins L, Van Belkum A, Alaidan**  
442           **A, Hays JP.** 2008. Analysis of VanA vancomycin-resistant *Enterococcus*  
443           *faecium* isolates from Saudi Arabian hospitals reveals the presence of clonal  
444           cluster 17 and two new Tn1546 lineage types. J Antimicrob Chemother  
445           **62**:279-283.
- 446   19.   **Heaton MP, Discotto LF, Pucci MJ, Handwerker S.** 1996. Mobilization of  
447           vancomycin resistance by transposon-mediated fusion of a VanA plasmid with  
448           an *Enterococcus faecium* sex pheromone-response plasmid. Gene **171**:9-17.
- 449   20.   **Wang J-L, Wang J-T, Chen S-Y, Chen Y-C, Chang S-C.** 2010. Distribution  
450           of staphylococcal cassette chromosome *mec* types and correlation with  
451           comorbidity and infection type in patients with MRSA bacteremia. PLoS One  
452           **5**:e9489.
- 453   21.   **Chen P-Y, Chuang Y-C, Wang J-T, Chang S-C.** 2015. Impact of prior  
454           healthcare-associated exposure on clinical and molecular characterization of  
455           methicillin-susceptible *Staphylococcus aureus* bacteremia: results from a  
456           retrospective cohort study. Medicine **94**:e474.

- 457 22. **Chang C-J, Chen N-C, Lao C-K, Huang Y-C.** 2015. Nasal *Staphylococcus*  
458 *aureus* and methicillin-resistant *S. aureus* carriage among janitors working in  
459 hospitals in northern Taiwan. PLoS One **10**:e0138971.
- 460 23. **Chen C-J, Huang Y-C, Su L-H, Wu T-L, Huang S-H, Chien C-C, Chen P-**  
461 **Y, Lu M-C, Ko W-C.** 2014. Molecular Epidemiology and Antimicrobial  
462 Resistance of Methicillin-Resistant *Staphylococcus aureus* Bloodstream  
463 Isolates in Taiwan, 2010. PLoS One **9**:e101184.
- 464 24. **Ho P-L, Lai EL, Chow K-H, Chow LS, Yuen K-Y, Yung RW.** 2008.  
465 Molecular epidemiology of methicillin-resistant *Staphylococcus aureus* in  
466 residential care homes for the elderly in Hong Kong. Diagn Microbiol Infect  
467 Dis **61**:135-142.
- 468 25. **Ip M, Wang Z, Lam WY, Zhou H, Tsui S.** 2014. Draft genome sequence of  
469 methicillin-resistant *Staphylococcus aureus* CUHK\_188 (ST188), a health  
470 care-associated bacteremic isolate from Hong Kong. Genome Announc  
471 **2**:e00255-00214.
- 472 26. **Liu C, Chen Z-j, Sun Z, Feng X, Zou M, Cao W, Wang S, Zeng J, Wang Y,**  
473 **Sun M.** 2015. Molecular characteristics and virulence factors in methicillin-  
474 susceptible, resistant, and heterogeneous vancomycin-intermediate  
475 *Staphylococcus aureus* from central-southern China. J Microbiol Immunol  
476 Infect **48**:490-496.
- 477 27. **Ko KS, Lee J-Y, Baek JY, Peck KR, Rhee J-Y, Kwon KT, Heo ST, Ahn K-**  
478 **M, Song J-H.** 2008. Characterization of *Staphylococcus aureus* nasal carriage  
479 from children attending an outpatient clinic in Seoul, Korea. Microb Drug  
480 Resist **14**:37-44.
- 481 28. **Qiao Y, Ning X, Chen Q, Zhao R, Song W, Zheng Y, Dong F, Li S, Li J,**



- 482           **Wang L.** 2014. Clinical and molecular characteristics of invasive community-  
483           acquired *Staphylococcus aureus* infections in Chinese children. BMC Infect  
484           Dis **14**:582.
- 485   29.   **Kos VN, Desjardins CA, Griggs A, Cerqueira G, Van Tonder A, Holden**  
486   **MT, Godfrey P, Palmer KL, Bodi K, Mongodin EF.** 2012. Comparative  
487           genomics of vancomycin-resistant *Staphylococcus aureus* strains and their  
488           positions within the clade most commonly associated with Methicillin-  
489           resistant *S. aureus* hospital-acquired infection in the United States. mBio  
490           **3**:e00112-00112.
- 491   30.   **Chua K, Seemann T, Harrison PF, Davies JK, Coutts SJ, Chen H, Haring**  
492   **V, Moore R, Howden BP, Stinear TP.** 2010. Complete genome sequence of  
493           *Staphylococcus aureus* strain JKD6159, a unique Australian clone of ST93-IV  
494           community methicillin-resistant *Staphylococcus aureus*. J Bacteriol **192**:5556-  
495           5557.
- 496   31.   **Chua KY, Seemann T, Harrison PF, Monagle S, Korman TM, Johnson**  
497   **PD, Coombs GW, Howden BO, Davies JK, Howden BP.** 2011. The  
498           dominant Australian community-acquired methicillin-resistant *Staphylococcus*  
499           *aureus* clone ST93-IV [2B] is highly virulent and genetically distinct. PLoS  
500           One **6**:e25887.
- 501   32.   **Baba T, Takeuchi F, Kuroda M, Yuzawa H, Aoki K-i, Oguchi A, Nagai Y,**  
502   **Iwama N, Asano K, Naimi T.** 2002. Genome and virulence determinants of  
503           high virulence community-acquired MRSA. Lancet **359**:1819-1827.
- 504   33.   **Shearer JE, Wireman J, Hostetler J, Forberger H, Borman J, Gill J,**  
505   **Sanchez S, Mankin A, LaMarre J, Lindsay JA.** 2011. Major families of  
506           multiresistant plasmids from geographically and epidemiologically diverse

- 507           staphylococci. *G3* **1**:581-591.
- 508   34.   **Stegger M, Driebe EM, Roe C, Lemmer D, Bowers JR, Engelthaler DM,**  
509           **Keim P, Andersen PS.** 2013. Genome sequence of *Staphylococcus aureus*  
510           strain CA-347, a USA600 methicillin-resistant isolate. *Genome Announc*  
511           **1**:e00517-00513.
- 512   35.   **Kuroda M, Ohta T, Uchiyama I, Baba T, Yuzawa H, Kobayashi I, Cui L,**  
513           **Oguchi A, Aoki K-i, Nagai Y.** 2001. Whole genome sequencing of methicillin-  
514           resistant *Staphylococcus aureus*. *Lancet* **357**:1225-1240.
- 515   36.   **O'Brien FG, Eto KY, Murphy RJ, Fairhurst HM, Coombs GW, Grubb**  
516           **WB, Ramsay JP.** 2015. Origin-of-transfer sequences facilitate mobilisation of  
517           non-conjugative antimicrobial-resistance plasmids in *Staphylococcus aureus*.  
518           *Nucleic Acids Res* **43**:7971-7983.
- 519   37.   **Ramsay JP, Kwong SM, Murphy RJ, Yui Eto K, Price KJ, Nguyen QT,**  
520           **O'Brien FG, Grubb WB, Coombs GW, Firth N.** 2016. An updated view of  
521           plasmid conjugation and mobilization in *Staphylococcus*. *Mob Genet Elements*  
522           **6**:e1208317.
- 523   38.   **Haaber J, Penadés JR, Ingmer H.** 2017. Transfer of Antibiotic Resistance in  
524           *Staphylococcus aureus*. *Trends Microbiol* **25**:893-905.
- 525   39.   **O'brien F, Ramsay J, Monecke S, Coombs G, Robinson O, Htet Z,**  
526           **Alshaikh F, Grubb W.** 2015. *Staphylococcus aureus* plasmids without  
527           mobilization genes are mobilized by a novel conjugative plasmid from  
528           community isolates. *J Antimicrob Chemother* **70**:649-652.
- 529   40.   **Bayles KW, Iandolo JJ.** 1989. Genetic and molecular analyses of the gene  
530           encoding staphylococcal enterotoxin D. *J Bacteriol* **171**:4799-4806.
- 531   41.   **Omoe K, Hu D-L, Takahashi-Omoe H, Nakane A, Shinagawa K.** 2003.

- 532 Identification and characterization of a new staphylococcal enterotoxin-related  
533 putative toxin encoded by two kinds of plasmids. *Infect Immun* **71**:6088-6094.
- 534 42. **Zhang S, Iandolo JJ, Stewart GC.** 1998. The enterotoxin D plasmid of  
535 *Staphylococcus aureus* encodes a second enterotoxin determinant (*sej*). *FEMS*  
536 *Microbiol Lett* **168**:227-233.
- 537 43. **Higuchi W, Takano T, Teng L-J, Yamamoto T.** 2008. Structure and specific  
538 detection of staphylococcal cassette chromosome *mec* type VII. *Biochem*  
539 *Biophys Res Commun* **377**:752-756.
- 540 44. **Weigel LM, Clewell DB, Gill SR, Clark NC, McDougal LK, Flannagan**  
541 **SE, Kolonay JF, Shetty J, Killgore GE, Tenover FC.** 2003. Genetic analysis  
542 of a high-level vancomycin-resistant isolate of *Staphylococcus aureus*. *Science*  
543 **302**:1569-1571.
- 544 45. **Panesso D, Planet PJ, Diaz L, Hugonnet J-E, Tran TT, Narechania A,**  
545 **Munita JM, Rincon S, Carvajal LP, Reyes J.** 2015. Methicillin-susceptible,  
546 vancomycin-resistant *Staphylococcus aureus*, Brazil. *Emerg Infect Dis*  
547 **21**:1844.
- 548 46. **Rossi F, Diaz L, Wollam A, Panesso D, Zhou Y, Rincon S, Narechania A,**  
549 **Xing G, Di Gioia TS, Doi A.** 2014. Transferable vancomycin resistance in a  
550 community-associated MRSA lineage. *N Engl J Med* **370**:1524-1531.
- 551 47. **Odd G, Brakstad, Kjetill Aasbakk, Maeland JA.** 1992. Detection of  
552 *Staphylococcus aureus* by Polymerase Chain Reaction Amplification of the  
553 *nuc* Gene. *J Clin Microbiol* **30**:1654-1660.
- 554 48. **B. Shopsin, M. Gomez, S. O. Montgomery, D. H. Smith M, Waddington,**  
555 **D. E. Dodge, D. A. Bost, M. Riehman S, Naidich, Kreiswirth. BN.** 1999.  
556 Evaluation of Protein A Gene Polymorphic Region DNA Sequencing for

- 557            Typing of *Staphylococcus aureus* Strains. J Clin Microbiol **37**:3556–3563.
- 558    49.    **Mark C. Enright, Nicholas P. J. Day, Catrin E. Davies, Sharon J. Peacock,**  
559            **Spratt. BG.** 2000. Multilocus Sequence Typing for Characterization of  
560            Methicillin-Resistant and Methicillin-Susceptible Clones of *Staphylococcus*  
561            *aureus*. J Clin Microbiol **38**:1008–1015.
- 562    50.    **Murray B, Singh K, Heath JD, Sharma B, Weinstock G.** 1990. Comparison  
563            of genomic DNAs of different enterococcal isolates using restriction  
564            endonucleases with infrequent recognition sites. J Clin Microbiol **28**:2059-  
565            2063.
- 566    51.    **Barton BM, Harding GP, Zuccarelli AJ.** 1995. A general method for  
567            detecting and sizing large plasmids. Anal Biochem **226**:235-240.
- 568    52.    **Rahman M, Connolly S, Noble W, Cookson B, Phillips I.** 1990. Diversity of  
569            staphylococci exhibiting high-level resistance to mupirocin. J Med Microbiol  
570            **33**:97-100.

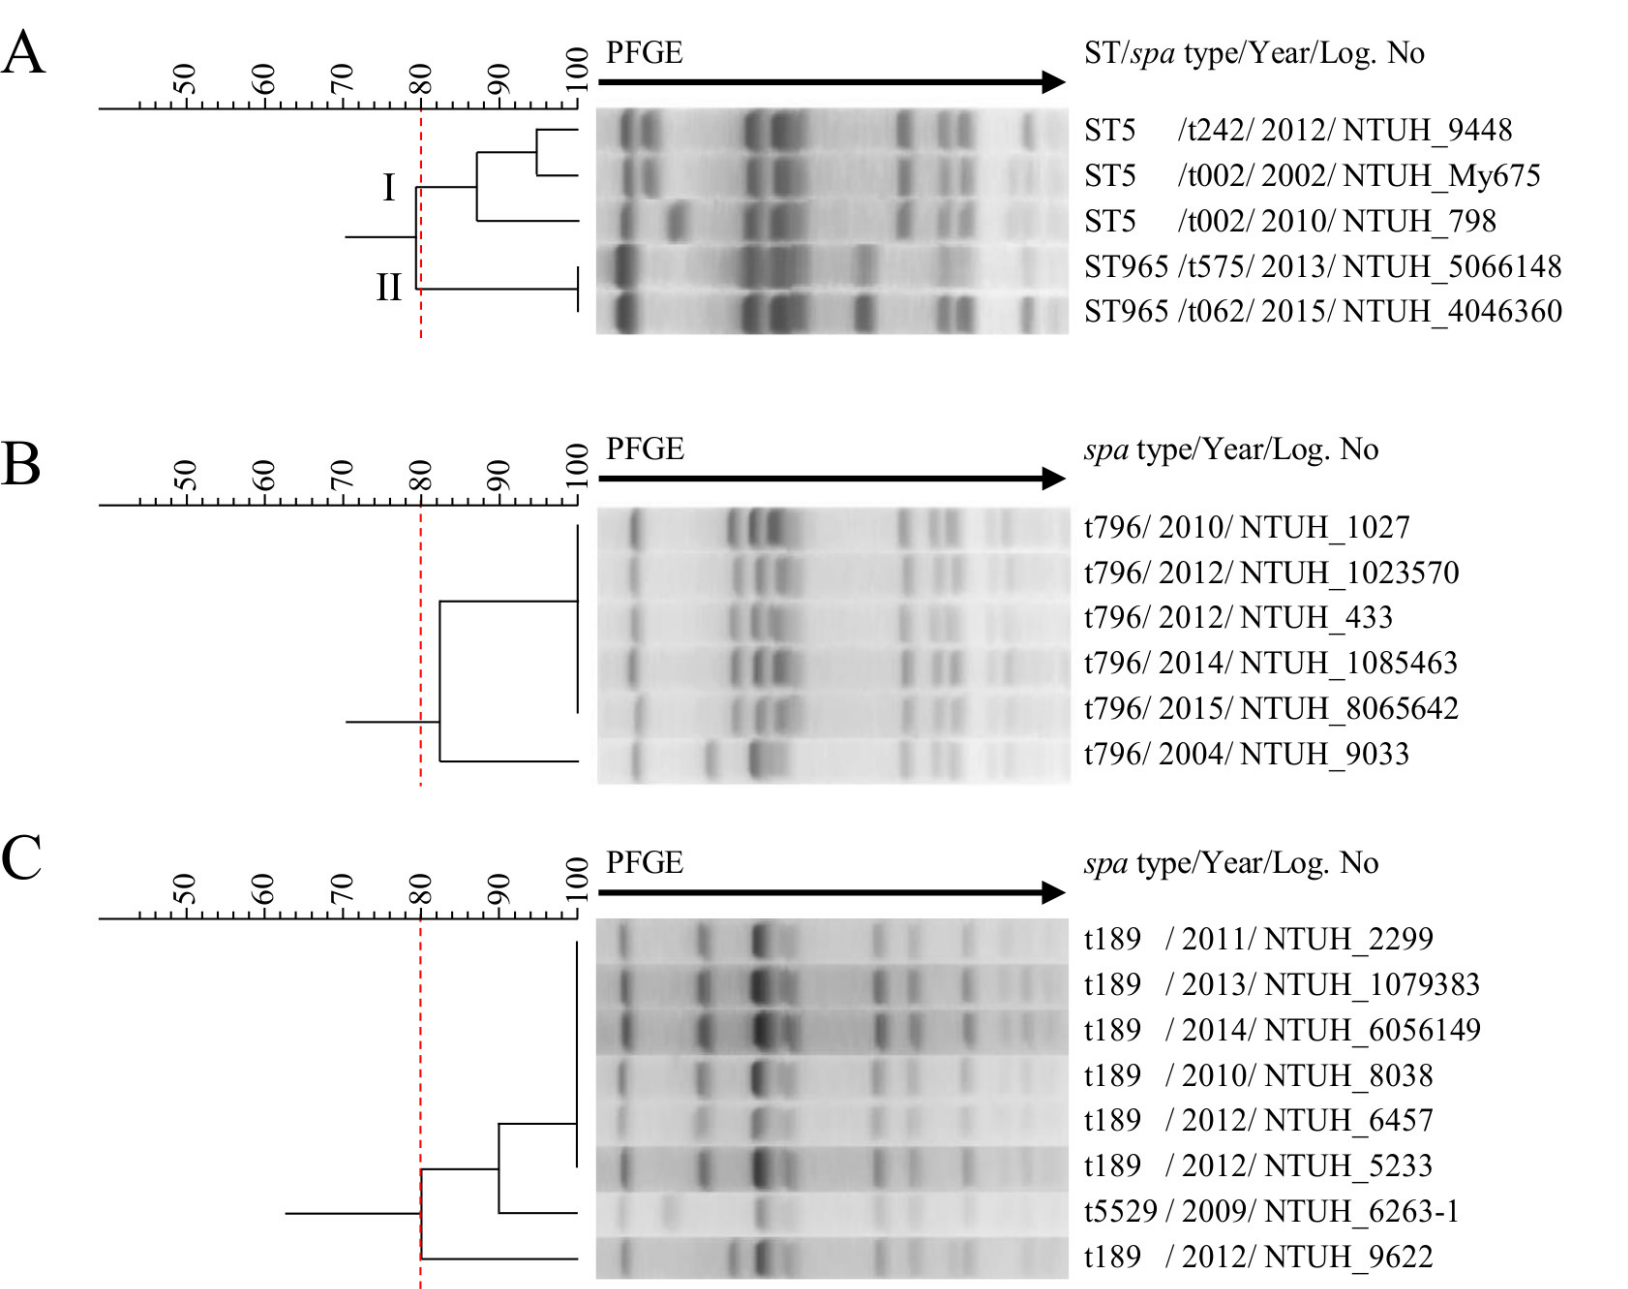

**FIG 1** PFGE dendrogram of *Tn1546-ermB* carrying isolates.

PFGE cluster was assigned to isolates having 80% or greater similarity from the dendrograms (A) Three ST5 MSSA isolates (pulsotype I) and two ST965 MRSA isolates (pulsotype II) (B) Six ST7 MSSA isolates (C) Eight ST188 MRSA isolates.

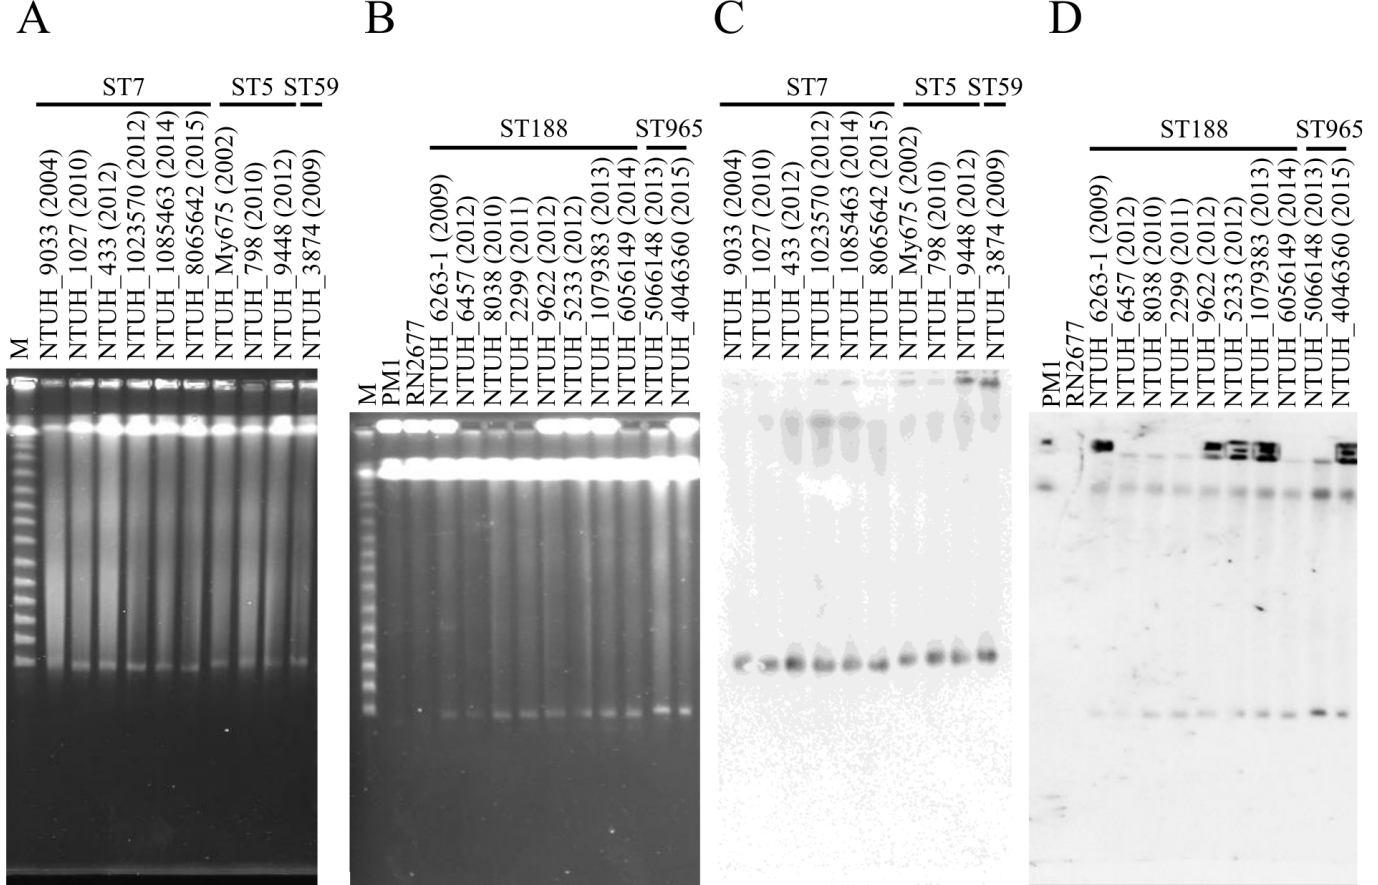

**FIG 2** S1 nuclease PFGE and Southern blot hybridization with *ermB*. The S1 nuclease PFGE from three ST5 MSSA, six ST7 MSSA, one ST59 MSSA, eight ST188 MRSA, and two ST965 MRSA was examined. The PM1 strain harboring a 26-kb plasmid and *ermB* gene located on chromosome was used as a positive control. Strain RN2677, lacking the plasmid and *ermB* gene, was used as a negative control. The size of the M marker starts at 48.5 kb and increases 48.5 kb with each successively larger band. (A, B) The bands indicated the plasmids. The size of plasmids is estimated between 23.1 kb and 48.5 kb. (C, D) DNA was hybridized with the Dig-labelled *ermB*-specific probe and amplified by PCR using primers *ermB*-f and *ermB*-r. Positive signal of *ermB* was detected in respective bands.

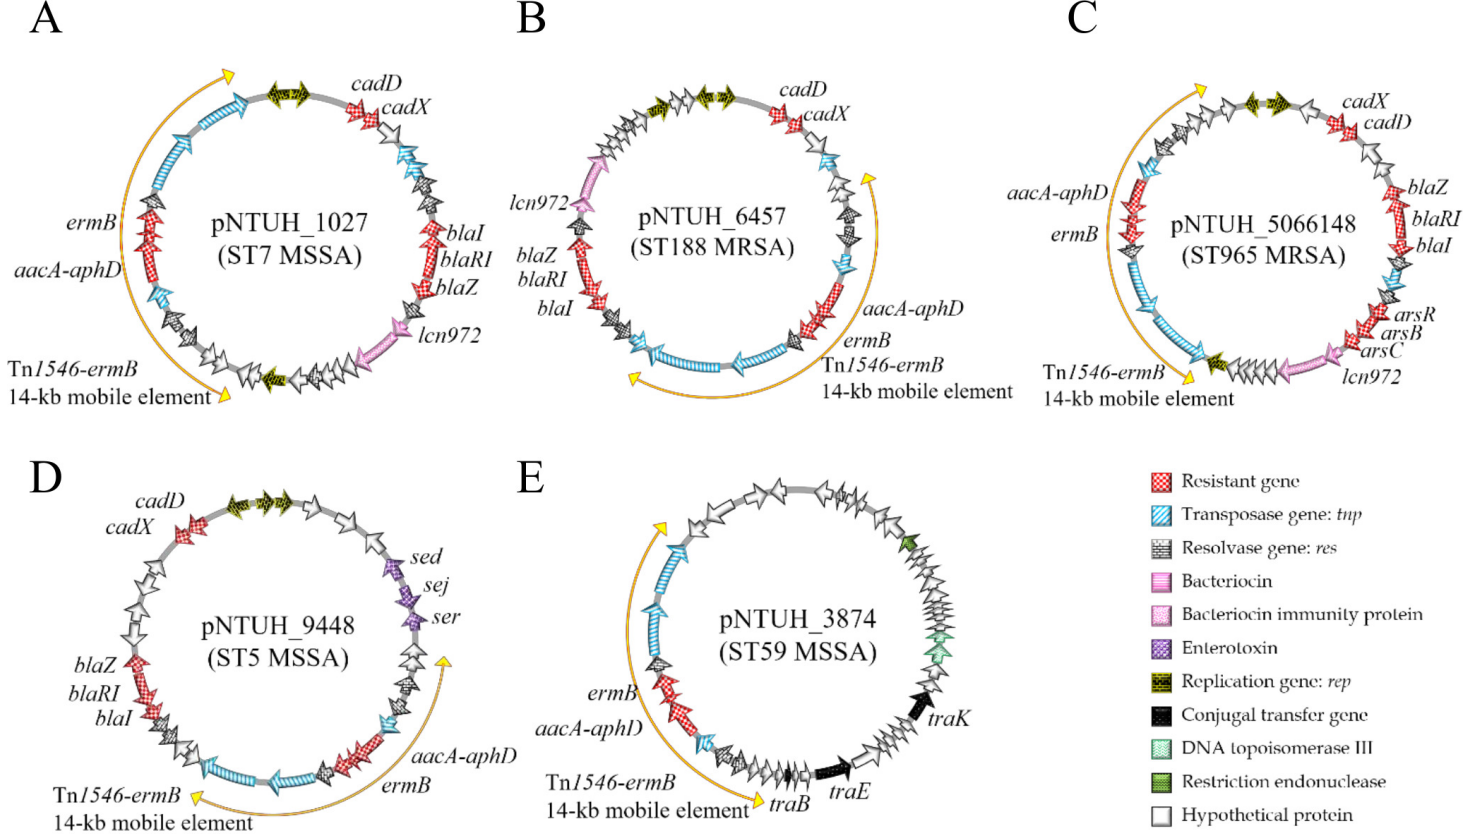

**FIG 3** Structure of plasmids. (A) The 35.2-kb ST7 MSSA NTUH\_1027 plasmid included 14.5-kb *Tn1546-ermB* element and 20.7-kb backbone which is similar to pSaa6159, harboring bacteriocin Lcn972 (*lcn972* gene, pink stripe). The *Tn1546-ermB* element was inserted at the eleven o'clock position in pNTUH\_1027. (B) The 35.2-kb ST188 MRSA NTUH\_6457 plasmid included 14.5-kb *Tn1546-ermB* element and 20.7-kb backbone which is similar to pSaa6159, harboring bacteriocin Lcn972 (*lcn972* gene, pink stripe). The *Tn1546-ermB* element was inserted at the three o'clock position in pNTUH\_6457. (C) The 39.2-kb ST965 MRSA NTUH\_5066148 plasmid contained the 14.5-kb *Tn1546-ermB* and a 24.7-kb backbone which is similar to pCA-347, harboring bacteriocin Lcn972 (*lcn972* gene, pink stripe). (D) The 42.5-kb ST5 MSSA NTUH\_9448 plasmid included 14.5-kb *Tn1546-ermB* element and 27.2-kb pWBG744, harboring three enterotoxin genes *sed*, *sej*, and *ser* (purple mesh). (E) The 46.8-kb ST59 MSSA NTUH\_3874 plasmid harbored three conjugal genes *traB*, *traE*, and *traK*.

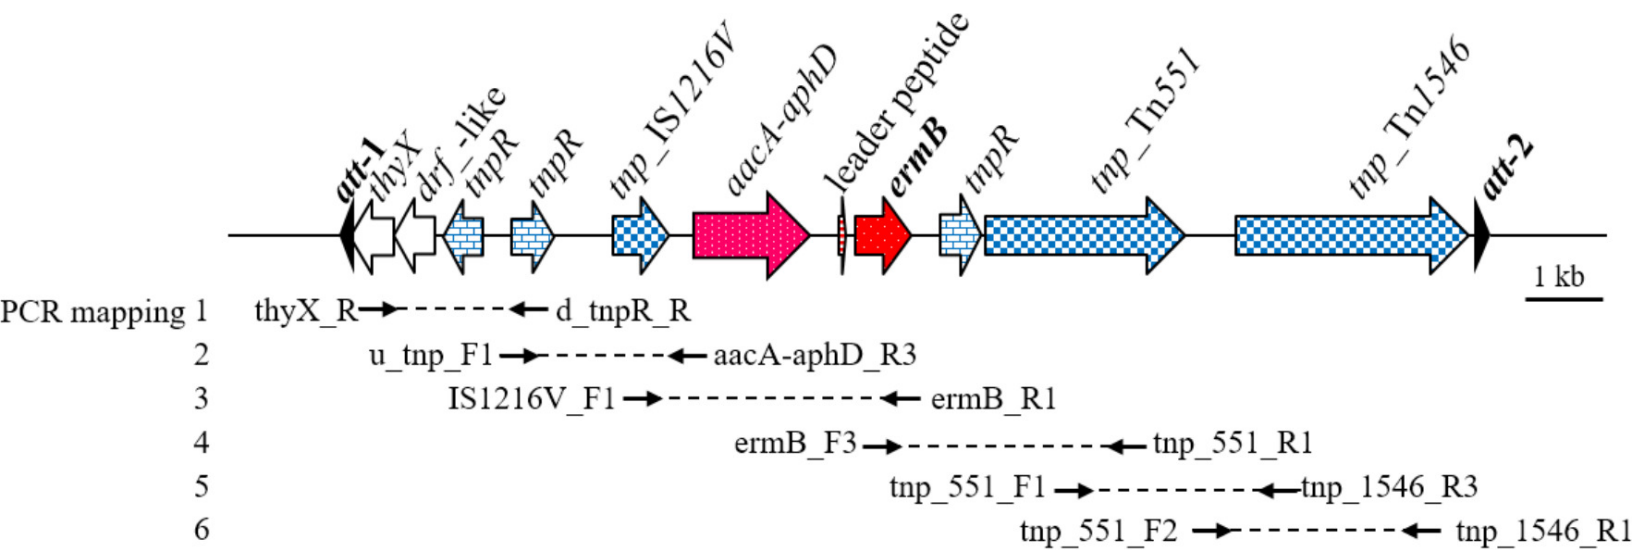

**FIG 4** Position of PCR primers for detection of the Tn1546-*ermB* element structure amplicons for PCR mapping 1, 2, 3, 4, 5 and 6 are approximately 1.9 kb, 2.8 kb, 3.7 kb, 3.5 kb, 3.1 kb, and 3.2 kb, respectively.
